# Supplementary material for: Terpenoids Commonly Found in Cannabis sativa Do Not Modulate the Actions of Phytocannabinoids or Endocannabinoids on TRPA1 and TRPV1 Channels
Source: PubMed Central journal article supplement (PMC7759271; doi:10.1089/can.2019.0099), 2020-12-15
Supplement: Supp_FigS1.pdf [file Supp_FigS1.pdf]

## Supplementary Data

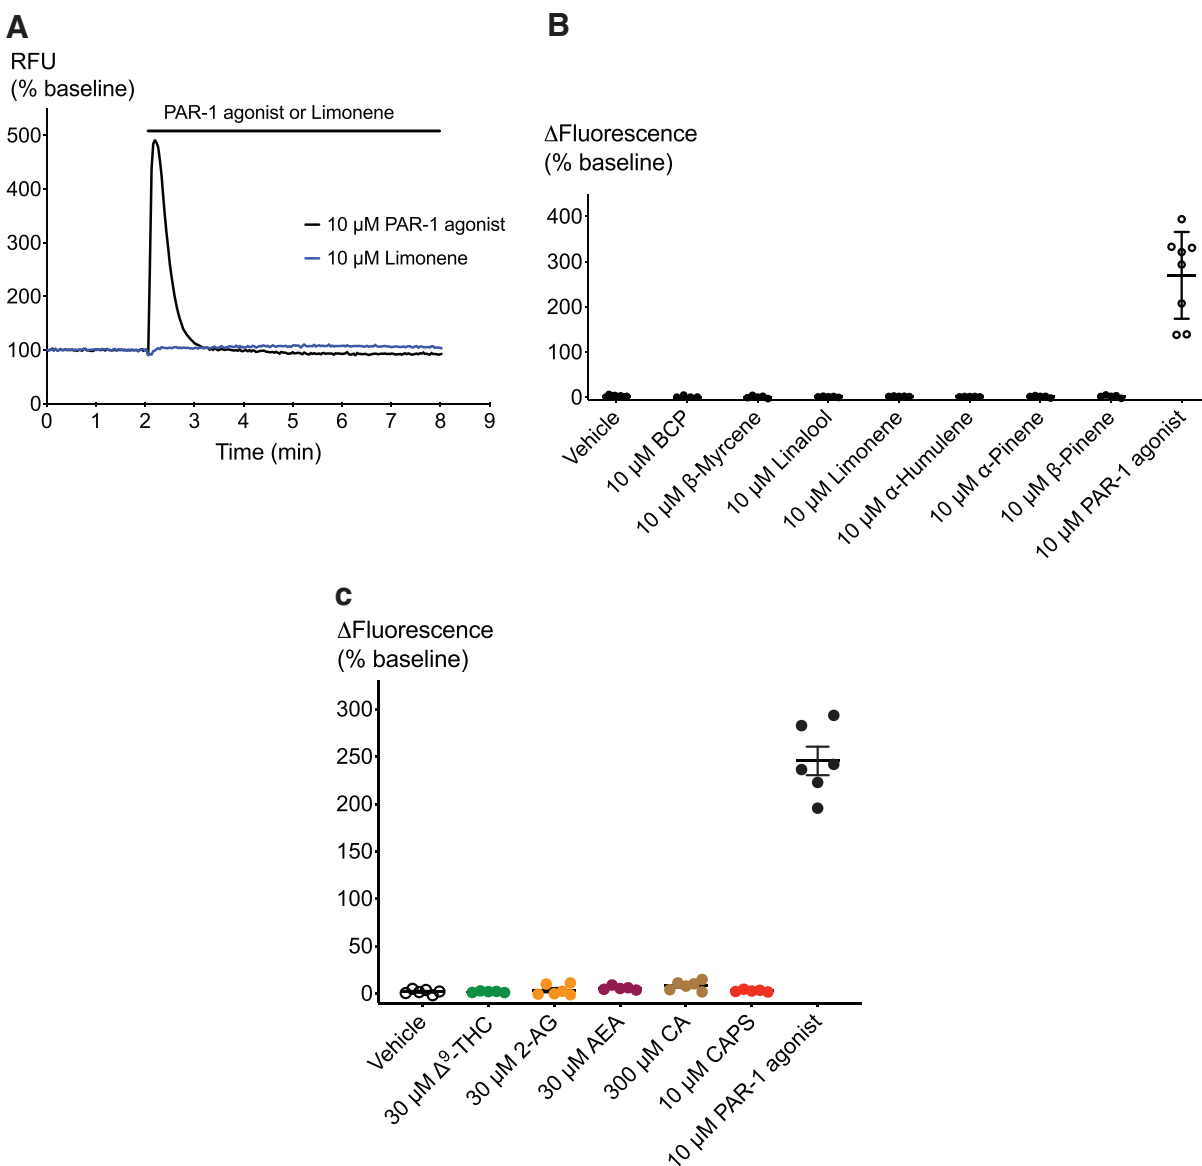

**SUPPLEMENTARY FIG. S1.** WT cells do not respond to terpenoids and TRPA1 and TRPV1 agonists. **(A)** Representative trace showing the effects of 10  $\mu$ M limonene (blue) and 10  $\mu$ M PAR-1 agonist (black) on WT cells. **(B)** Maximum change in fluorescence from baseline upon application of 10  $\mu$ M terpenoid or 10  $\mu$ M PAR-1 agonist. **(C)** CAPS,  $\Delta^9$ -THC, AEA, 2-AG, and CA do not induce changes in  $[Ca]_i$  in WT cells. Unpaired *t*-test. *N* = 5–8, mean  $\pm$  SEM. Drugs were added for the duration of the bar.  $\Delta^9$ -THC,  $\Delta^9$ -tetrahydrocannabinol; 2-AG, 2-arachidonoylglycerol; AEA, anandamide; CA, cinnamaldehyde; CAPS, capsaicin; PAR-1, protease activated receptor 1; SEM, standard error of the mean; TRPA1, transient receptor potential ankyrin 1; TRPV1, transient receptor potential vanilloid 1; WT, wild-type.
