# Supplementary material for: Terpenoids Commonly Found in Cannabis sativa Do Not Modulate the Actions of Phytocannabinoids or Endocannabinoids on TRPA1 and TRPV1 Channels
Source: PubMed Central journal article supplement (PMC7759271; doi:10.1089/can.2019.0099), 2020-12-15
Supplement: Supp_FigS2.pdf [file Supp_FigS2.pdf]

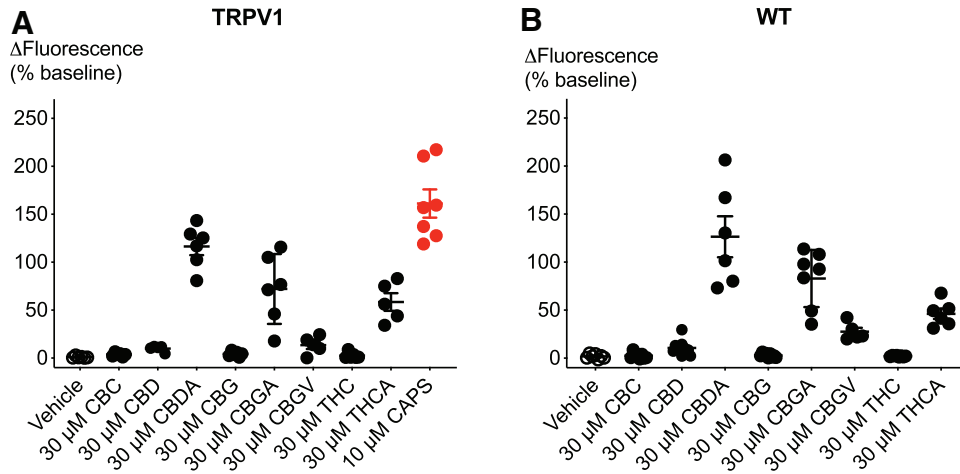

**SUPPLEMENTARY FIG. S2.** Effects of phytocannabinoids on hTRPV1 and WT cells. **(A)** Response of hTRPV1 cells to common phytocannabinoids. **(B)** CBDA, CBGA, CBGV, and THCA induce an increase in  $[Ca]_i$  in WT cells. Effects of phytocannabinoids are not significantly different between hTRPV1 and WT cells. Unpaired *t*-test.  $N > 5$ , mean  $\pm$  SEM. CBDA, cannabidiolic acid; CBGA, cannabigerolic acid; CBGV, cannabigerovarin; hTRPA1, human transient receptor potential ankyrin 1; hTRPV1, human transient receptor potential vanilloid 1; THCA, tetrahydrocannabinolic acid.
